# Supplementary material
Source: PubMed Central journal article supplement (PMC6960350)
Supplement: NIHMS1547417-supplement-1.pdf [file NIHMS1547417-supplement-1.pdf]

**SUPPLEMENTARY MATERIAL TO ACCOMPANY:**

**LIQUID CHROMATOGRAPHY-ION MOBILITY SPECTROMETRY-MASS SPECTROMETRY ANALYSIS OF  
MULTIPLE CLASSES OF STEROID HORMONE ISOMERS IN A MIXTURE**

---

***Alana L. Rister<sup>1</sup> and Eric D. Dodds<sup>1,2</sup>***

<sup>1</sup>Department of Chemistry and

<sup>2</sup>Nebraska Center for Integrated Biomolecular Communication

University of Nebraska – Lincoln

Lincoln, NE, 68588-0304, USA

**Table S1.** Names, molecular weights, and structures of the steroids studied here.

| Name                    | Average Molecular Weight (g/mol) | Structure                                                                             |
|-------------------------|----------------------------------|---------------------------------------------------------------------------------------|
| <b>Testosterone</b>     | 288.43                           | 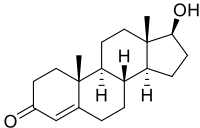   |
| <b>Epitestosterone</b>  | 288.43                           |    |
| <b>DHEA</b>             | 288.43                           |    |
| <b>Androsterone</b>     | 290.44                           |   |
| <b>Epiandrosterone</b>  | 290.44                           |  |
| <b>Corticosterone</b>   | 346.47                           |  |
| <b>11-Deoxycortisol</b> | 346.47                           |  |
| <b>Cortisone</b>        | 360.45                           |  |
| <b>Aldosterone</b>      | 360.45                           |  |

**Table S2.** Gradient for the method that achieves the elution of all steroids in 11 minutes.

| <b>Time</b> | <b>Flow Rate<br/>(<math>\mu\text{L}/\text{min}</math>)</b> | <b>%Water</b> | <b>%Methanol</b> |
|-------------|------------------------------------------------------------|---------------|------------------|
| Initial     | 13                                                         | 50            | 50               |
| 6.5         | 13                                                         | 50            | 50               |
| 8.5         | 13                                                         | 0             | 100              |
| 18.0        | 13                                                         | 0             | 100              |
| 20.0        | 13                                                         | 50            | 50               |
| 20.5        | 13                                                         | 50            | 50               |

**Table S3.** Gradient for the method that achieves the elution of all steroids in 12 minutes.

| <b>Time</b> | <b>Flow Rate<br/>(<math>\mu\text{L}/\text{min}</math>)</b> | <b>%Water</b> | <b>%Methanol</b> |
|-------------|------------------------------------------------------------|---------------|------------------|
| Initial     | 9                                                          | 80            | 20               |
| 4.0         | 9                                                          | 40            | 60               |
| 7.0         | 9                                                          | 0             | 100              |
| 22.5        | 9                                                          | 0             | 100              |
| 24.5        | 9                                                          | 70            | 30               |
| 25.0        | 9                                                          | 70            | 30               |

**Table S4.** Gradient for the method that achieves the elution of all steroids in 14 minutes.

| <b>Time</b> | <b>Flow Rate<br/>(<math>\mu\text{L}/\text{min}</math>)</b> | <b>%Water</b> | <b>%Methanol</b> |
|-------------|------------------------------------------------------------|---------------|------------------|
| Initial     | 11                                                         | 55            | 45               |
| 7.0         | 12                                                         | 53            | 47               |
| 11.5        | 12                                                         | 0             | 100              |
| 22.5        | 12                                                         | 0             | 100              |
| 24.5        | 11                                                         | 55            | 45               |
| 25.0        | 11                                                         | 55            | 45               |

**Table S5.** Average CCSs ( $\Omega$ ) and standard deviations (SD;  $n = 4$ ) for the lithiated dimeric steroid species. These are compared to literature CCSs and standard deviations (SD;  $n = 4$ ) from Rister *et al.* [1]. These collision cross sections are evaluated with respect to their relative error (% error between literature values and those reported here) and compared *via t*-test.

|                         | <i>m/z</i> | $\Omega$ ( $\text{\AA}^2$ ) | SD  | Lit. $\Omega$ ( $\text{\AA}^2$ ) | Lit. SD | % Error | $t_{\text{calc}}$ | $t_{\text{crit}}$ (99%) |
|-------------------------|------------|-----------------------------|-----|----------------------------------|---------|---------|-------------------|-------------------------|
| <b>Testosterone</b>     | 583.43     | 283.8                       | 2.0 | 282.3                            | 2.5     | 0.52    | 0.43              | 5.841                   |
| <b>DHEA</b>             | 583.43     | 272.7                       | 2.2 | 271.8                            | 2.6     | 0.32    | 0.23              |                         |
| <b>Epitestosterone</b>  | 583.43     | 275.7                       | 1.6 | 275.3                            | 2.7     | 0.14    | 0.12              |                         |
| <b>Androsterone</b>     | 587.47     | 253.7                       | 1.9 | 255.4                            | 1.7     | -0.67   | 0.79              |                         |
| <b>Epiandrosterone</b>  | 587.47     | 273.5                       | 1.9 | 274.5                            | 2.0     | -0.35   | 0.38              |                         |
| <b>11-Deoxycortisol</b> | 699.44     | 295.1                       | 2.1 | 290.2                            | 0.2     | 1.69    | 3.35              |                         |
| <b>Corticosterone</b>   | 699.44     | 305.6                       | 2.1 | 307.0                            | 1.9     | -0.46   | 0.52              |                         |

**REFERENCES**

- [1] A.L. Rister, T.L. Martin, E.D. Dodds, Application of Group I Metal Adduction to the Separation of Steroids by Traveling Wave Ion Mobility Spectrometry, *J. Am. Soc. Mass Spectrom.*, 30 (2018) 248-255.
